# Supplementary material for: Preparing of Point-of-Care Reagents for Risk Assessment in the Elderly at Home by a Home-Visit Nurse and Verification of Their Analytical Accuracy
Source: MDPI journal article supplement (doi:10.3390/diagnostics13142407), 2023-07-19
Supplement: s1 [file s1]

File S1. List of equipment and reagents used.

| Product Name                                      | Company                                        | Catalogue number  | Lot number |
|---------------------------------------------------|------------------------------------------------|-------------------|------------|
| Microvolume spectrophotometer                     | DeNovix Inc., DE, U.S.A.                       | DS-11+            |            |
| Ultrasonic cleaning machine                       | Sharp Corporation, Osaka, Japan                | UT-106            |            |
| Cutting module                                    | BioDot Inc., CA. U.S.A.                        | CM4000            |            |
| Antibody coating machine                          |                                                | PD1020            |            |
| Vacuum desiccator                                 | AS ONE Corp., Osaka, Japan                     | Type VW           |            |
| Dry vacuum pump                                   | ULVAC, Inc., Kanagawa, Japan                   | DA-60D            |            |
| Heater incubator                                  | PHC Corp., Ehime, Japan                        | MIR-H263-PJ       |            |
| Electronic balance                                | A&D Company, Ltd., Tokyo, Japan                | FA-200            |            |
| Analytical balance                                |                                                | HR-60             |            |
| Micro cooled centrifuge                           | TOMY Digital Biology Co., Ltd., Tokyo, Japan   | MX-307            |            |
| PH meter                                          | Mettler-Toledo International, Inc., OH, U.S.A. | Seven easy        |            |
| Low protein adsorption tube                       | FUKAE KASEI CO., Ltd., Hyogo, Japan            | PK-20C-500        |            |
| Nitrocellulose membrane (Hi-Flow Plus HFC13502)   | Merck Millipore, MA, U.S.A.                    | HF13502XSS        | R0JB99676C |
| Sample absorbent pad (Cellulose Fiber Sample Pad) |                                                | CFSP223000        |            |
| Glass fiber conjugate pad (GFCP)                  |                                                | GFCP103000        | 92065001   |
| Plasma separator pad (CytoSep Grade 1660)         | PALL Corp., NY, U.S.A.                         | S70002            | T12591     |
| Backing sheet                                     | NIPPON engineering Co., Ltd., Tokyo, Japan     | 334042/11GL-56338 | 070158-01  |
| Housing case                                      | NIPPON engineering Co., Ltd., Tokyo, Japan     | 32208/300         |            |

|                                               |                                                 |           |            |
|-----------------------------------------------|-------------------------------------------------|-----------|------------|
| Filter                                        | Vessel Co. Ltd., Tokyo, Japan                   |           |            |
| Endo to endo pipettes                         | AS ONE Corp., Osaka, Japan                      | 3-5998-07 | 2411528    |
| Anti-hCRP 6407 SPTN-7                         | Medix Biochemica, Espoo, Finland                | 100147    | 0044968    |
| Goat x-Human C-Reactive protein               | Bethyl Laboratories, Texas, USA                 | A80-125A  | 11         |
| AU colloidal solution-SC (particle size 40nm) | TANAKA Holdings Co., Ltd., Tokyo, Japan         |           | A201016-1F |
| BIOTIN NHS-water Soluble                      | Vector Laboratories, California, USA            | SP-1210   | ZE0316     |
| Streptavidin                                  | Prospec-Tany technogene Ltd., Rehovot, Israel   | Pro-791   | 918PSTREP  |
| Silica gel                                    | Tokai chemical industry Co., Ltd., Aichi, Japan |           | 81102      |
| BSA                                           | Sigma-Aldrich Japan, Tokyo, Japan               | A3050-50G | SLBT8252   |
| Trizma base                                   |                                                 | T1503-1KG | SLBW6320   |
| ProClin300                                    |                                                 | 48912 U   | MKCK5149   |
| Potassium chloride                            | FUJIFILM Wako Pure Chemical Corp., Tokyo, Japan | 163-03545 | WDQ2822    |
| Sucrose                                       |                                                 | 196-00015 | CAH4164    |
| Polyethylene glycol 20,000                    |                                                 | 168-11285 | SDN0465    |
| Sodium azide                                  |                                                 | 197-11091 | MCG7769    |
| Casein                                        |                                                 | 030-01505 | PTK2231    |
| Sodium hydrogen carbonate                     |                                                 | 191-01305 | PTQ-3293   |
| Sodium cholate                                |                                                 | 197-08502 | KWE2070    |
| Sodium dodecyl sulfate                        |                                                 | 191-07145 | CDN8564    |
| Glycine                                       |                                                 | 01194-00  | 211K1374   |
| Sodium chloride                               | KANTO Chemical Co., Inc., Tokyo, Japan          | 37144-00  | 012C5603   |
| Hydrochloric acid                             |                                                 | 18078-00  | 012H1018   |
| Sodium hydroxide                              |                                                 | 37184-00  | 010H6096   |
| Boric acid                                    |                                                 | 04232-00  | 910H1296   |
| Sodium carbonate                              |                                                 | 37141-00  | 707X2043   |
| Disodium hydrogen                             |                                                 | 37240-00  | 008H1536   |

|                                       |  |          |          |
|---------------------------------------|--|----------|----------|
| phosphate                             |  |          |          |
| Potassium dihydrogen phosphate        |  | 32379-00 | 003H1254 |
| Sodium dihydrogen phosphate dihydrate |  | 37239-00 | 909H1719 |
