# Supplementary material for: Preparing of Point-of-Care Reagents for Risk Assessment in the Elderly at Home by a Home-Visit Nurse and Verification of Their Analytical Accuracy
Source: MDPI journal article supplement (doi:10.3390/diagnostics13142407), 2023-07-19
Supplement: s1 [file s1]

**Supplementary file S3.** The characteristics of patients.

| Patient No. | Sex | Age | Diagnosis            | Outcome           | Medical history                                              | Clinical bacteriological examination |                                                                                                               |                     |
|-------------|-----|-----|----------------------|-------------------|--------------------------------------------------------------|--------------------------------------|---------------------------------------------------------------------------------------------------------------|---------------------|
|             |     |     |                      |                   |                                                              | Blood culture                        | Suction sputum or expectorated sputum                                                                         | Urinary catheter    |
| 1           | M   | 68  | Legionella pneumonia | Hospital transfer | Hypertension,<br>Dyslipidemia,<br>Mental retardation         | -                                    | Neisseria $\alpha$ -streptococcus 1+,<br>Corynebacterium sp. 2+,<br>Coagulase(-) Staphylococcus 2+            | Escherichia coli 3+ |
| 2           | F   | 82  | Bacterial pneumonia  | Hospital transfer | Mycobacterium avium complex                                  | -                                    | Neisseria $\alpha$ -streptococcus 1+                                                                          | -                   |
| 3           | M   | 75  | Aspiration pneumonia | Healing           | UNK                                                          | -                                    | Neisseria $\alpha$ -streptococcus 1+,<br>Candida albicans 1+,<br>Coagulase(-) Staphylococcus 1+               | -                   |
| 4           | M   | 82  | Aspiration pneumonia | Healing           | Rectal cancer                                                | -                                    | Neisseria $\alpha$ -streptococcus 3+,<br>Hamophilus influenzae 3+                                             | -                   |
| 5           | M   | 70  | Bacterial pneumonia  | Hospital transfer | Cerebral infarction,<br>Subarachnoid hemorrhage              | -                                    | -                                                                                                             | -                   |
| 6           | F   | 79  | Atypical pneumonia   | Healing           | Non-tuberculous mycobacterial disease,<br>Chronic bronchitis | -                                    | Mycobacterium avium,<br>Aspergillus niger 1+,<br>Candida albicans 1+,<br>Neisseria $\alpha$ -streptococcus 3+ | -                   |
| 7           | M   | 31  | Bacterial            | Healing           | UNK                                                          | -                                    | Neisseria $\alpha$ -streptococcus 2+                                                                          | -                   |

|    |   |    |                                  |           |                                                                                            |   |                                                                                                                                            |                         |
|----|---|----|----------------------------------|-----------|--------------------------------------------------------------------------------------------|---|--------------------------------------------------------------------------------------------------------------------------------------------|-------------------------|
| 8  | F | 82 | pneumonia<br>Bacterial pneumonia | Healing   | Cardiomyopathy,<br>Alzheimer dementia                                                      | - | Candida albicans 1+,<br>Neisseria $\alpha$ -streptococcus 1+                                                                               | -                       |
| 9  | F | 94 | Bacterial pneumonia              | Mortality | Hypertension,<br>Atrial fibrillation,<br>Pulmonary edema                                   | - | Candida albicans 1+,<br>Neisseria $\alpha$ -streptococcus 3+,<br>Coagulase(-) Staphylococcus<br>1+                                         | -                       |
| 10 | F | 72 | Aspiration pneumonia             | Healing   | Septic shock,<br>Acute respiratory failure,<br>Acute heart failure                         | - | Candida albicans 1+,<br>Pseudomonas aeruginosa 3+,<br>Corynebacterium sp. 2+                                                               | Enterococcus faecium 1+ |
| 11 | M | 61 | Bacterial pneumonia              | Healing   | Hypertension,<br>Atrial fibrillation,<br>Cerebral infarction                               | - | -                                                                                                                                          | -                       |
| 12 | M | 70 | Bacterial pneumonia              | Mortality | Hypertension,<br>Lung abscess,<br>Acute kidney injury,<br>Hypocalcaemia,<br>Mental illness | - | Pseudomonas aeruginosa 3+,<br>Neisseria $\alpha$ -streptococcus 3+,<br>Stenotrophomonas maltophilia<br>1+,<br>Mycobacterium intracellulare | -                       |
| 13 | M | 74 | Aspiration pneumonia             | Healing   | Respiratory failure,<br>Pneumothorax,<br>Disturbance of<br>consciousness,                  | - | Neisseria $\alpha$ -streptococcus 2+,<br>Coagulase(-) Staphylococcus<br>2+                                                                 | -                       |

|    |   |    |                      |                   |                         |   |                                       |                            |
|----|---|----|----------------------|-------------------|-------------------------|---|---------------------------------------|----------------------------|
|    |   |    |                      |                   | Dysphagia               |   |                                       |                            |
|    |   |    |                      |                   | Cerebral infarction,    |   | Neisseria $\alpha$ -streptococcus 2+  |                            |
|    |   |    |                      |                   | Diabete,                |   | <Alveolar lavage fluid>               |                            |
| 14 | M | 82 | Bacterial pneumonia  | Hospital transfer | Brain tumor,            | - | MRSA 1+,                              | -                          |
|    |   |    |                      |                   | Lung cancer             |   | Enterococcus faecium 1+,              |                            |
|    |   |    |                      |                   |                         |   | Candida albicans 1+                   |                            |
|    |   |    |                      |                   | Diabetes,               |   | Neisseria $\alpha$ -streptococcus 3+  |                            |
| 15 | M | 75 | Pneumonia            | Healing           | Hypertension,           | - |                                       | -                          |
|    |   |    |                      |                   | Dyslipidemia            |   |                                       |                            |
|    |   |    |                      |                   | Hypertension,           |   |                                       |                            |
| 16 | M | 73 | Pneumonia            | Healing           | Chronic renal failure,  | - | Neisseria $\alpha$ -streptococcus 3+  | -                          |
|    |   |    |                      |                   | Hyperuricemia           |   |                                       |                            |
|    |   |    |                      |                   | Lung cancer,            |   |                                       |                            |
|    |   |    |                      |                   | Hypertension,           |   |                                       |                            |
|    |   |    |                      |                   | Combined pulmonary      |   | Candida albicans 1+,                  |                            |
| 17 | F | 76 | Bacterial pneumonia  | Healing           | fibrosis and emphysema, | - | Neisseria $\alpha$ -streptococcus 2+, | -                          |
|    |   |    |                      |                   | Dyslipidemia,           |   | Bifidobacterium sp. 1+                |                            |
|    |   |    |                      |                   | Chronic obstructive     |   |                                       |                            |
|    |   |    |                      |                   | pulmonary disease       |   |                                       |                            |
|    |   |    |                      |                   |                         |   | Enterobacter aerogenes 1+,            |                            |
| 18 | F | 79 | Aspiration pneumonia | Hospital transfer | Parkinson's disease     | - | Candida albicans 1+,                  | Escherichia coli 3+,       |
|    |   |    |                      |                   |                         |   | Neisseria $\alpha$ -streptococcus 2+  | $\gamma$ -Streptococcus 3+ |

|    |   |    |                                       |                   |                                                                     |                                            |                                                                                                                                  |   |
|----|---|----|---------------------------------------|-------------------|---------------------------------------------------------------------|--------------------------------------------|----------------------------------------------------------------------------------------------------------------------------------|---|
| 19 | F | 62 | Bacterial pneumonia                   | Healing           | Chronic obstructive pulmonary disease,<br>Essential thrombocythemia | -                                          | Pseudomonas aeruginosa 1+,<br>Neisseria $\alpha$ -streptococcus 2+                                                               | - |
| 20 | M | 52 | Aspiration pneumonia                  | Mortality         | Bone marrow tumor,<br>Malignant glioma,<br>Dysphagia                |                                            | MSSA,<br>Neisseria $\alpha$ -streptococcus 3+,<br>Klebsiella pneumonia 1+                                                        | - |
| 21 | F | 73 | Aspiration pneumonia                  | Hospital transfer | Symptomatic epilepsy<br>Pulmonary edema                             | -                                          | Neisseria $\alpha$ -streptococcus 2+                                                                                             | - |
| 22 | M | 73 | Aspiration pneumonia                  | Hospital transfer | Spastic paralysis<br>Iron deficiency anemia                         | -                                          | MRSA 2+,<br>Corynebacterium sp. 2+,<br>Escherichia coli 3+,<br>Aspergillus fumigatus 1+,<br>Neisseria $\alpha$ -streptococcus 1+ | - |
| 23 | F | 23 | Suspected aspiration pneumonia        | Hospital transfer | Right empyema,<br>Respiratory failure,<br>Disuse syndrome           | Pseudo<br>monas<br>aerugin<br>osa<br>Mtype | Pseudomonas aeruginosa<br>Mtype 2+,<br>Neisseria $\alpha$ -streptococcus 2+,<br>Enterococcus faecalis 2+                         | - |
| 24 | M | 76 | Chronic obstructive pulmonary disease | Healing           | Pneumonia,<br>Atrial fibrillation,<br>Heart failure                 | -                                          | -                                                                                                                                | - |
| 25 | M | 84 | Aspiration                            | Healing           | Dysphagia,                                                          | -                                          | Enterobacter cloacae 2+,                                                                                                         | - |

|    |   |    |                                                   |           |                                                   |      |                                       |   |
|----|---|----|---------------------------------------------------|-----------|---------------------------------------------------|------|---------------------------------------|---|
|    |   |    | pneumonia                                         |           | Xerostomia                                        |      | Neisseria $\alpha$ -streptococcus 3+  |   |
|    |   |    |                                                   |           |                                                   |      | Pseudomonas aeruginosa 1+,            |   |
|    |   |    |                                                   |           |                                                   |      | Klebsiella pneumoniae 1+,             |   |
| 26 | F | 48 | Streptococcal sepsis                              | Healing   | UNK                                               | -    | Coagulase(-) Staphylococcus 2+,       | - |
|    |   |    |                                                   |           |                                                   |      | Candida albicans 2+                   |   |
|    |   |    |                                                   |           |                                                   |      | Coagulase(-) Staphylococcus 1+,       | - |
| 27 | F | 55 | Influenzal pneumonia                              | Healing   | UNK                                               | -    | $\gamma$ -Streptococcus 1+            |   |
|    |   |    |                                                   |           |                                                   |      | Klebsiella pneumoniae 1+,             |   |
| 28 | M | 81 | Influenzal pneumonia                              | Healing   | UNK                                               | -    | Candida tropicalis 2+,                | - |
|    |   |    |                                                   |           |                                                   |      | Neisseria $\alpha$ -streptococcus 3+  |   |
|    |   |    |                                                   |           |                                                   |      | Streptococcus dysgalactiae 3+,        |   |
|    |   |    |                                                   |           |                                                   |      | Klebsiella pneumoniae 1+,             |   |
| 29 | F | 89 | Aspiration pneumonia                              | Healing   | Cerebral infarction,<br>Dementia,<br>Osteoporosis | -    | Neisseria $\alpha$ -streptococcus 3+, |   |
|    |   |    |                                                   |           |                                                   |      | Coagulase(-) Staphylococcus 2+,       | - |
|    |   |    |                                                   |           |                                                   |      | Candida albicans 1+,                  |   |
|    |   |    |                                                   |           |                                                   |      | Neisseria $\alpha$ -streptococcus 1+  |   |
|    |   |    |                                                   |           |                                                   |      | MSSA 3+,                              |   |
| 30 | M | 74 | Staphylococcal pneumonia,<br>Aspiration pneumonia | Mortality | UNK                                               | MSSA | Candida krusei 2+,                    | - |
|    |   |    |                                                   |           |                                                   |      | Neisseria $\alpha$ -streptococcus 3+  |   |

|               |   |       |                     |         |                              |   |                                      |   |
|---------------|---|-------|---------------------|---------|------------------------------|---|--------------------------------------|---|
| 31            | M | 66    | Bacterial pneumonia | Healing | Chronic hepatitis, Enteritis | - | Neisseria $\alpha$ -streptococcus 2+ | - |
|               |   | 72.0  |                     |         |                              |   |                                      |   |
| Mean $\pm$ SD |   | $\pm$ |                     |         |                              |   |                                      |   |
|               |   | 12.6  |                     |         |                              |   |                                      |   |

---

M: Male; F: Female; UNK: Unknown
