# Supplementary figures and images for: Preparing of Point-of-Care Reagents for Risk Assessment in the Elderly at Home by a Home-Visit Nurse and Verification of Their Analytical Accuracy
Source: MDPI journal article supplement (doi:10.3390/diagnostics13142407), 2023-07-19

File S4. Representative images of Actim CRP at each detection range.

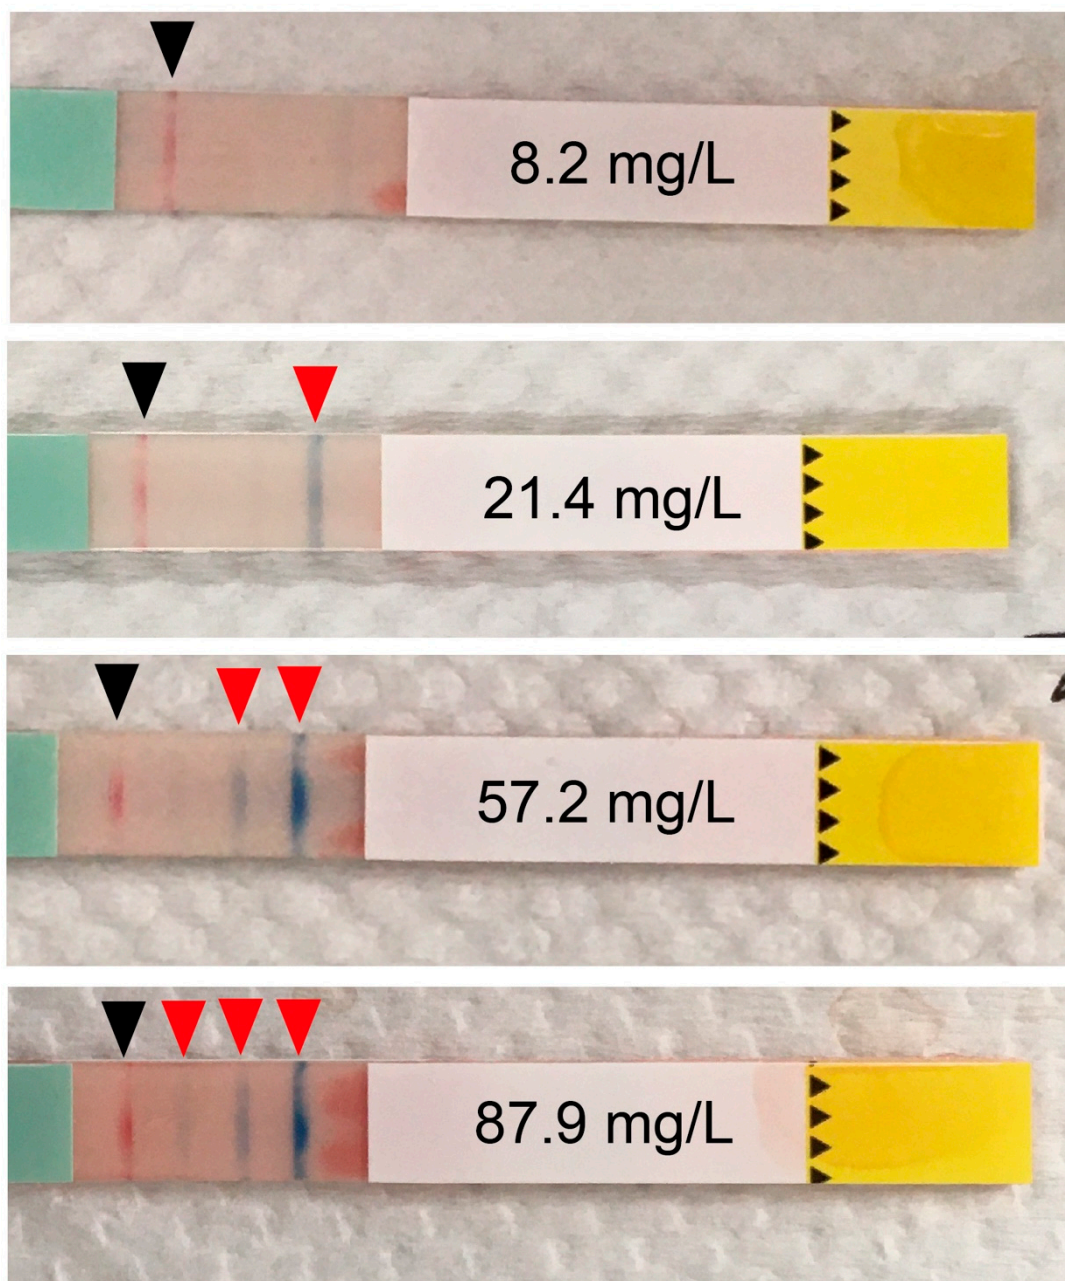

Supplement: s1 [file s1]
